# Supplementary material for: Viral microRNAs Target a Gene Network, Inhibit STAT Activation, and Suppress Interferon Responses
Source: PubMed Central journal article supplement (PMC5244407; doi:10.1038/srep40813), 2017-01-19
Supplement: srep40813-s1.pdf [file srep40813-s1.pdf]

# Viral microRNAs Target a Gene Network, Inhibit STAT Activation, and Suppress Interferon Responses

**Dhivya Ramalingam<sup>1</sup> and Joseph M. Ziegelbauer<sup>1\*</sup>**

<sup>1</sup> HIV and AIDS Malignancy Branch, National Cancer Institute, National Institutes of Health, Bethesda, Maryland 20892.

## **Supplementary Information**

**Figure S1.** Phosphorylated and total STAT information.

**Figure S2.** Full-length blots for Figure 3.

**Figure S3.** Full-length blots for Figures 4, 5, and 7.

**Table S1.** Luciferase data is shown (mean and standard deviation, n = 3) for all tested combinations of 3'UTR luciferase reporters and KSHV miRNAs reported in Figure 1.

**Table S2.** Sequences of the oligonucleotide primers used for the identification of non-canonical binding sites in the 3' untranslated regions of KSHV miRNA target genes reported in Figure 1.

**Table S3.** Interactions report from MetaCore analysis lists the publications that each interaction is based upon in Figure 2.

**Table S4.** BIRC5 3'UTR luciferase data.

Figure S1

A.

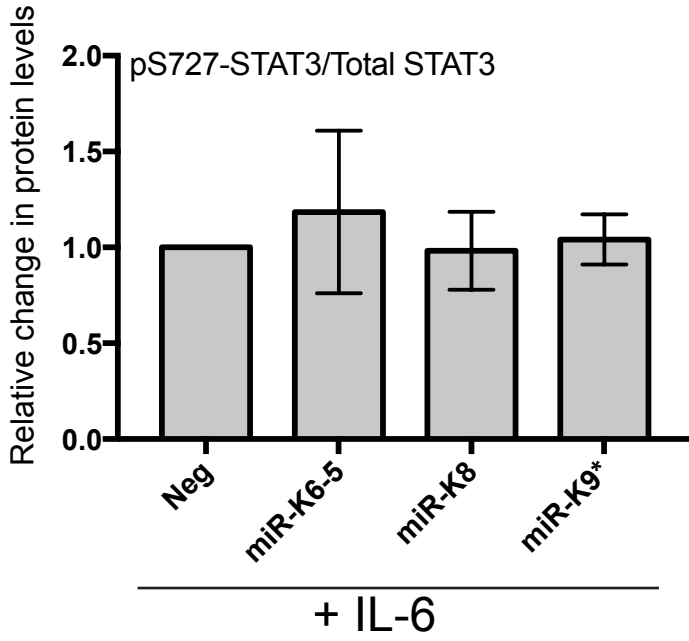

B.

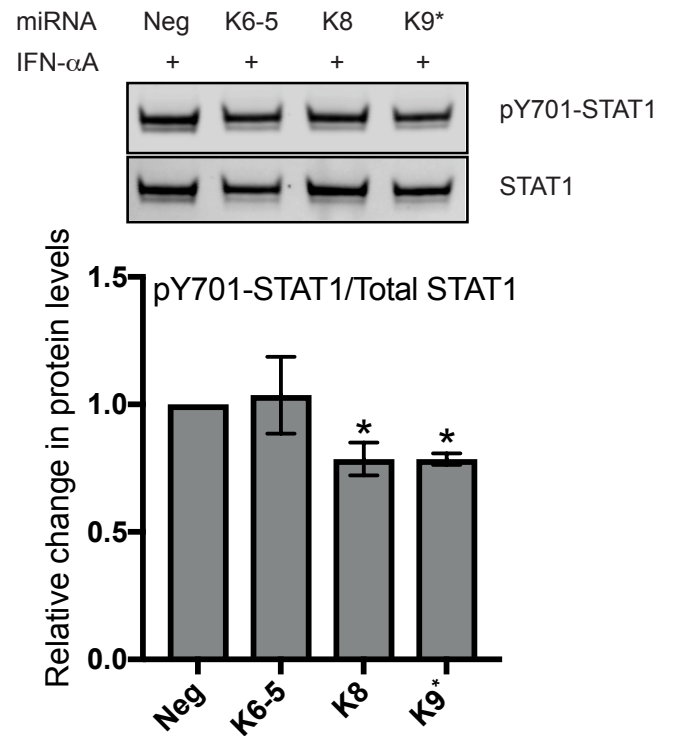

C.

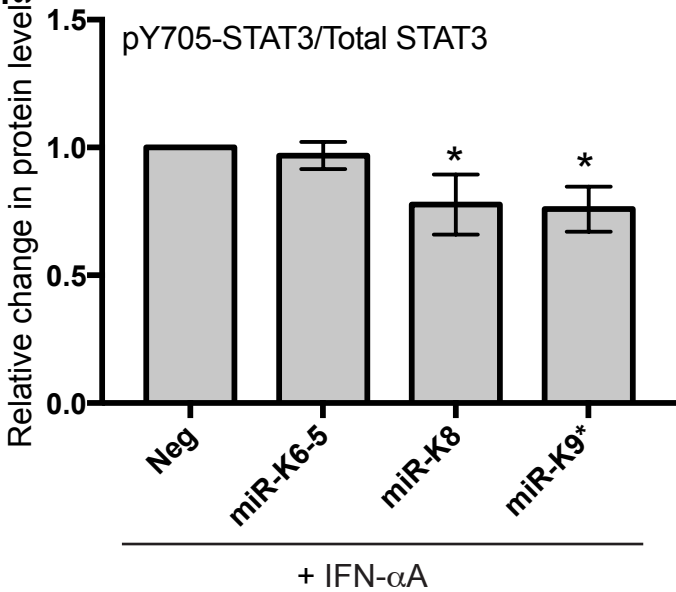

D.

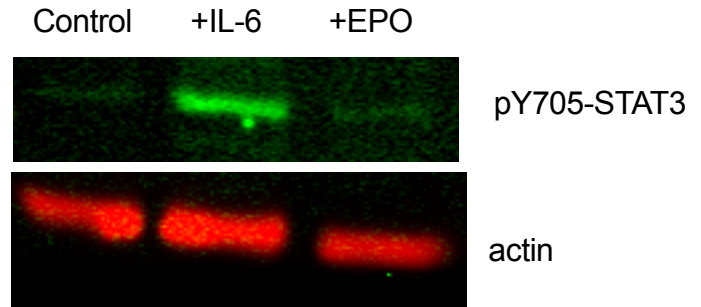

E.

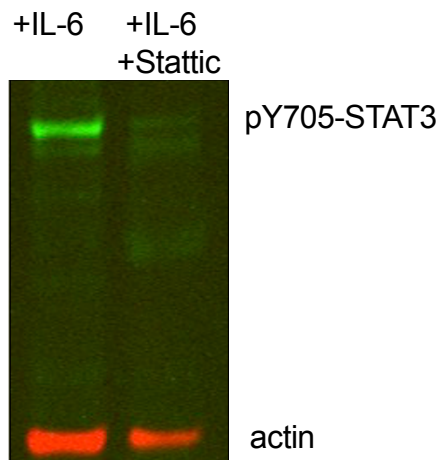

Supplementary Figure S1. Analysis of phosphorylated STAT proteins.

A. Ratios of pS727-STAT3 to total STAT3 are shown for IL-6 treated HUVECs. B. Western blot and ratios of pY701-STAT1 to total STAT1 are shown for IFN- $\alpha$ A treated HUVECs. C. Ratios of pY705-STAT3 to total STAT3 are shown for IFN- $\alpha$ A treated HUVECs. D. Western blot for IL-6 and EPO treated HUVECs are shown. E. Western blot for BCBL-1 cells treated with IL-6 and Stattic are shown.

Figure S2

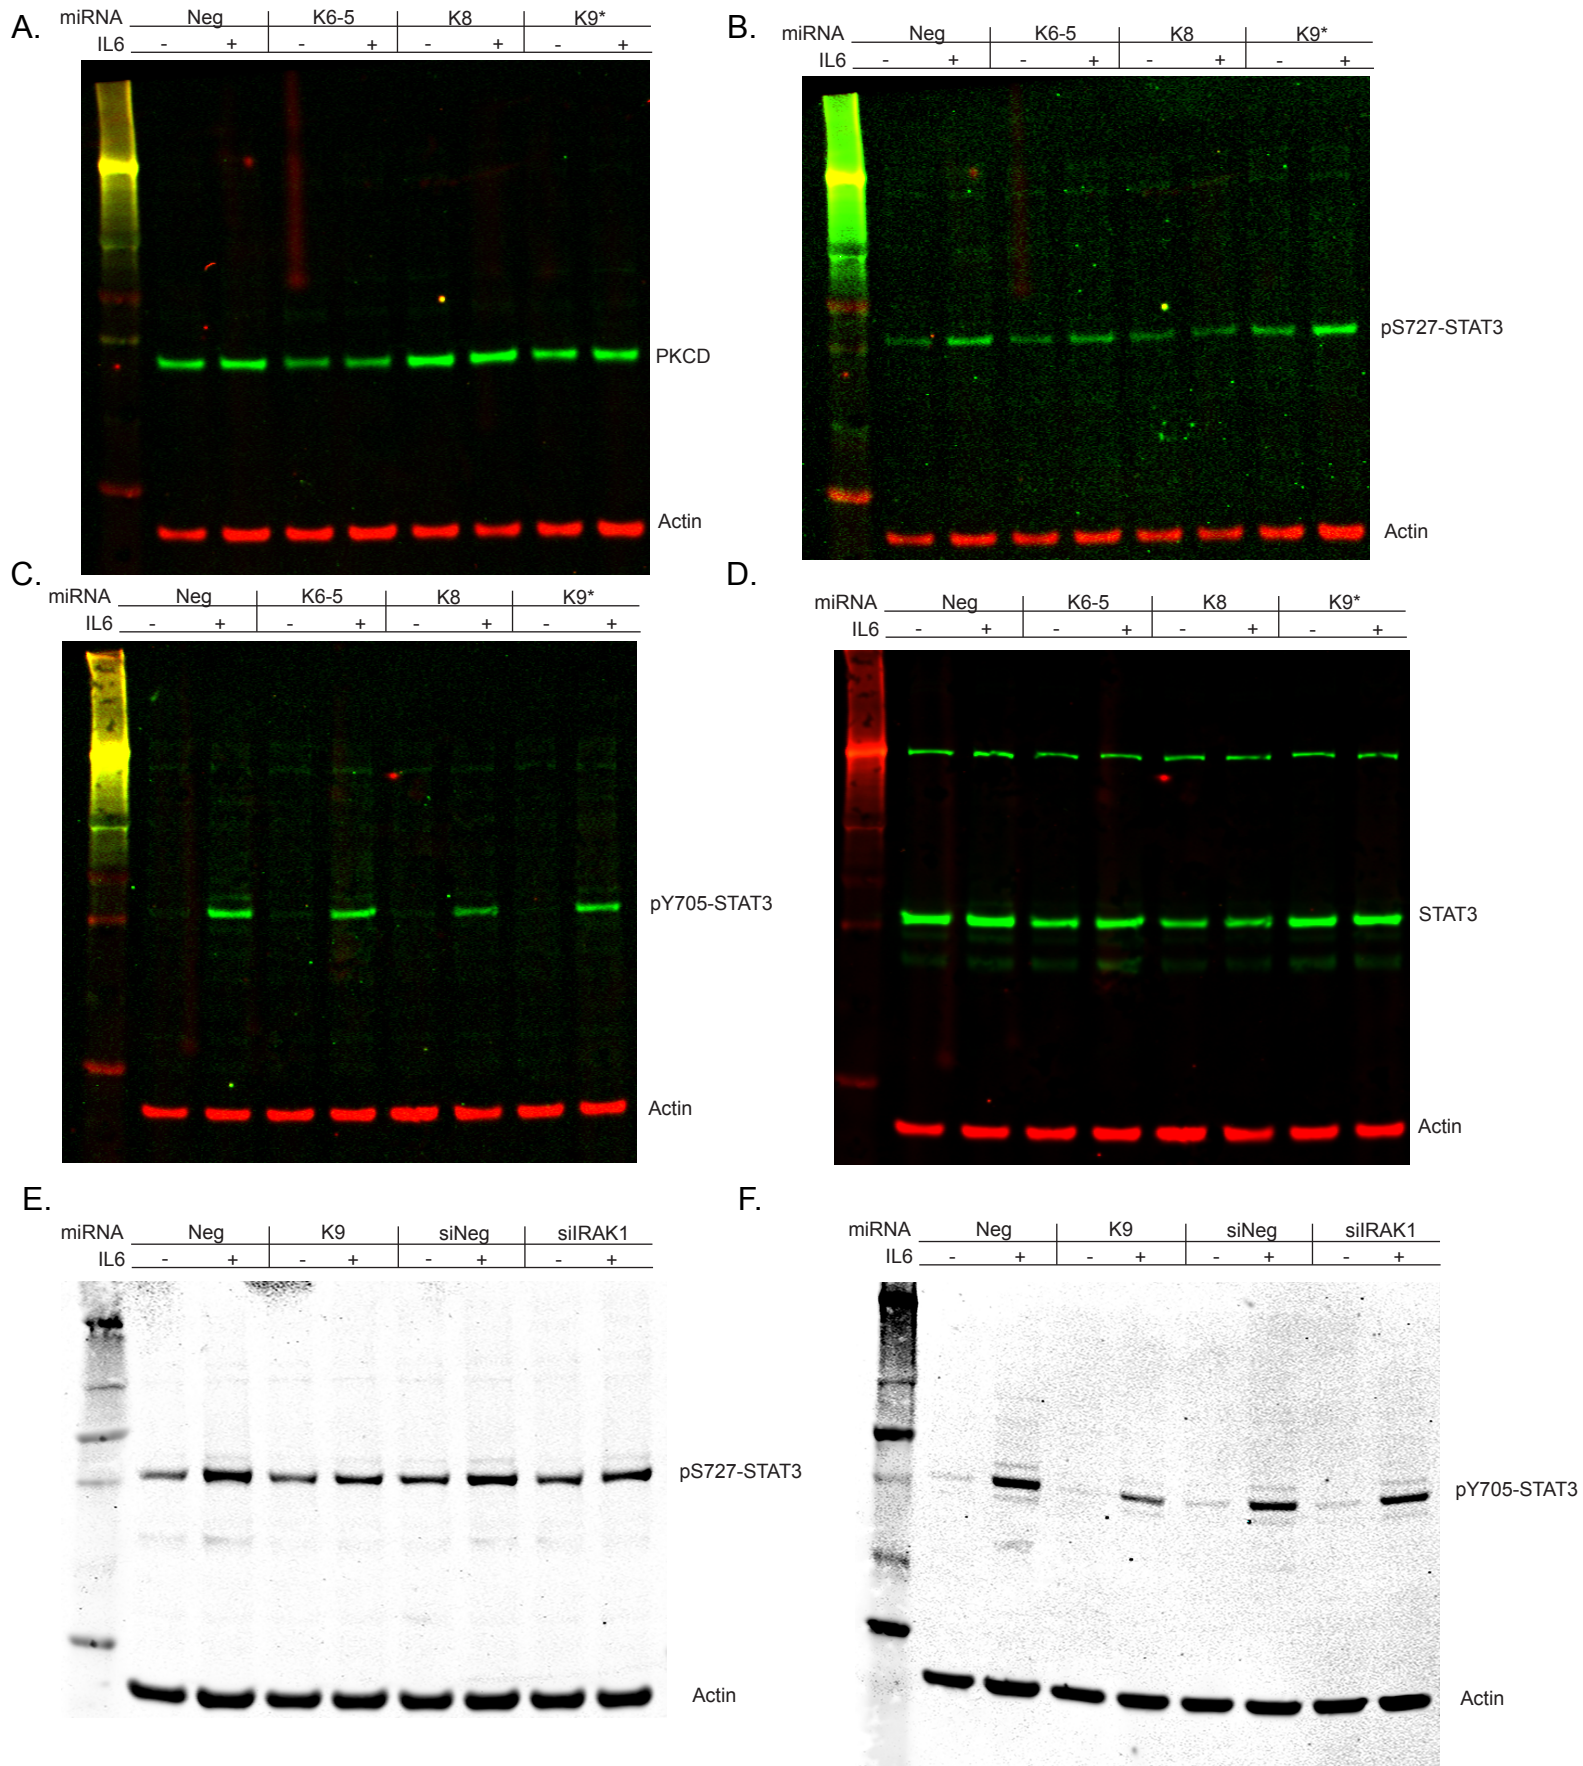

Supplementary Figure S2. Immunoblots in main figures.  
A-D. Full blots for Figure 3A. E-F. Full blots for Figure 3B.

Figure S3

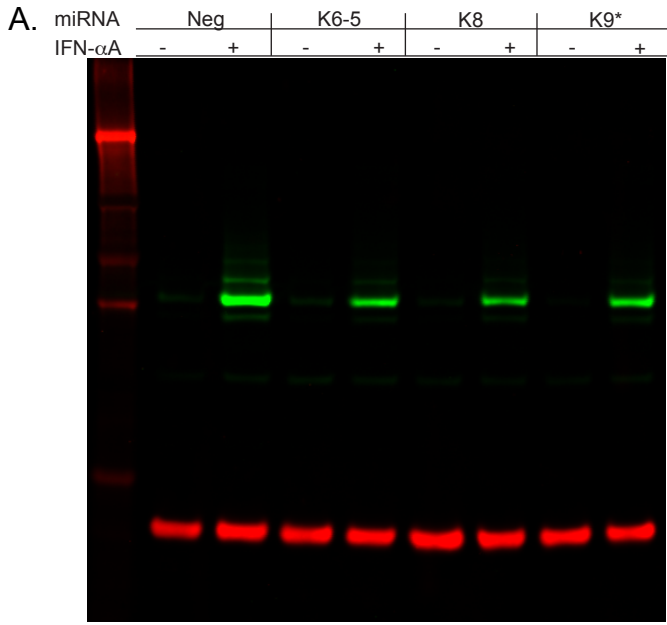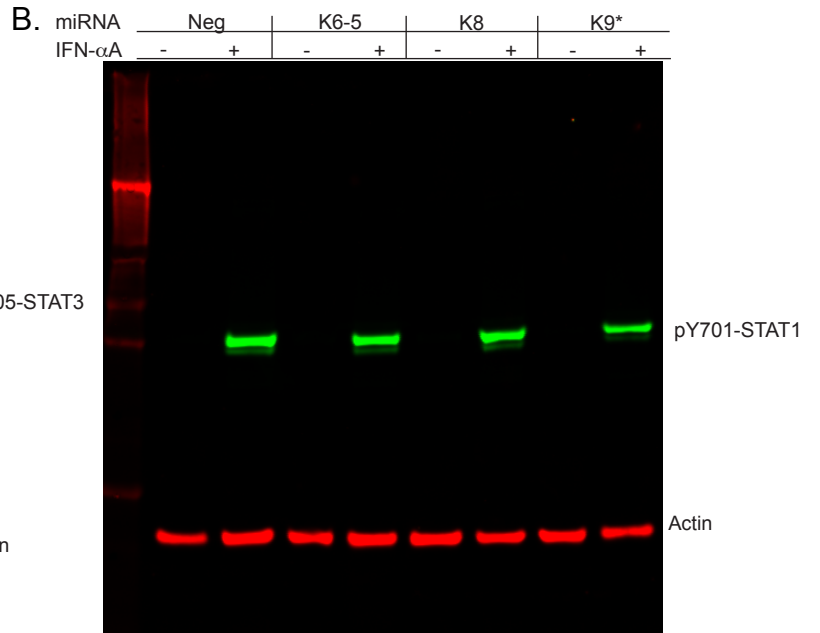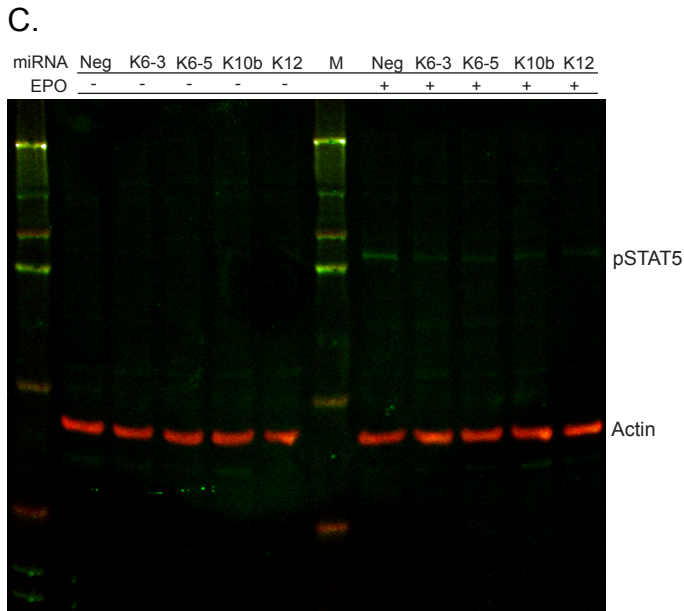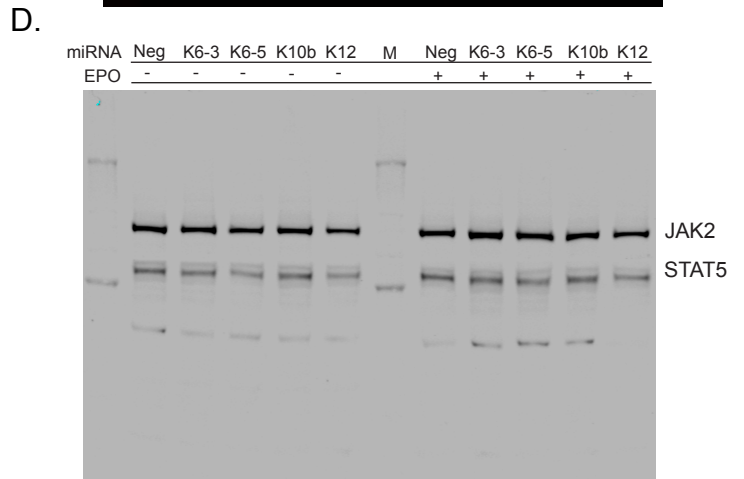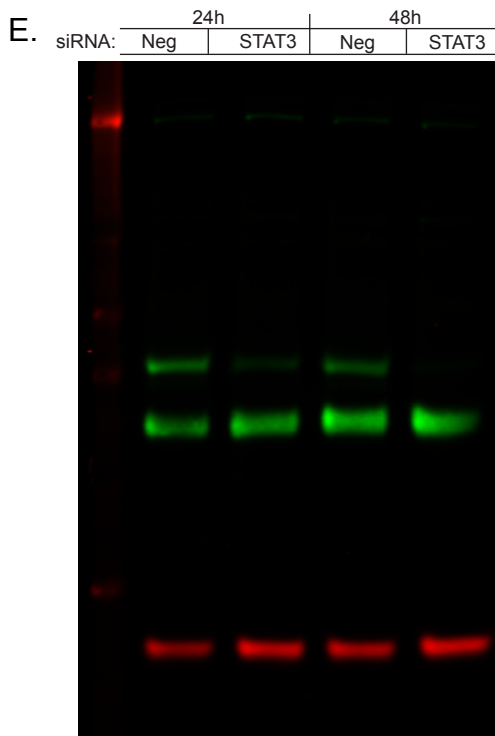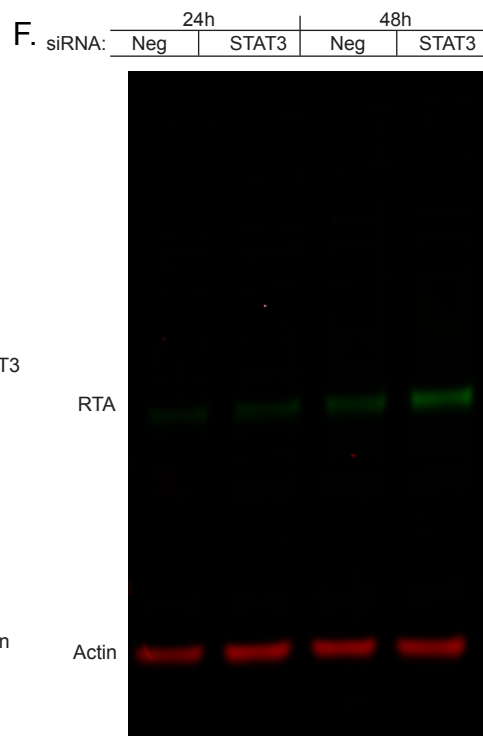

Supplementary Figure S3.  
Immunoblots in main figures.  
A-B. Full blots for Figure 4.  
C-D. Full blots for Figure 5.  
E-F. Full blots for Figure 7.

# Supplementary Table 1

| 3'UTR/miRNA | 1     | 2     | 3     | 3star | 4_3   | 4_5   | 5     | 6_3   | 6_5   | 7     | 8     | 9     | 9star | 10a   | 10b   | 11    | 12-5  |
|-------------|-------|-------|-------|-------|-------|-------|-------|-------|-------|-------|-------|-------|-------|-------|-------|-------|-------|
| CTSZ        |       |       |       | 1.142 |       |       |       |       |       |       |       |       |       | 0.929 |       |       |       |
| IRAK1       | 0.548 | 0.944 | 0.738 | 0.621 | 1.056 | 0.894 | 0.841 | 0.691 | 0.953 | 0.817 | 0.865 | 0.576 | 0.829 | 1.025 | 0.932 | 0.920 |       |
| TNFRSF12A   | 1.123 | 1.251 | 1.188 | 0.956 | 1.337 | 1.244 | 1.142 | 0.913 | 1.130 | 1.114 | 1.253 | 1.166 | 1.112 | 0.480 | 1.077 | 1.078 |       |
| VCL         |       | 0.955 | 0.973 |       |       |       |       | 0.967 | 1.153 |       | 1.280 |       |       |       |       |       |       |
| EPOR        |       |       |       |       |       |       |       |       |       |       |       | 1.439 | 0.823 |       | 1.176 |       |       |
| TAGLN       |       | 1.165 |       | 1.009 |       |       |       |       |       |       | 1.188 |       |       |       |       |       |       |
| FOXK2       |       |       |       |       | 0.975 |       |       |       |       |       | 1.161 |       |       |       |       |       |       |
| JARID1B     |       |       |       |       |       |       |       |       |       |       |       |       |       |       |       | 0.395 |       |
| MET         | 0.974 |       |       |       |       | 1.756 | 1.514 |       |       |       |       |       |       |       | 0.882 | 1.481 |       |
| CORT        |       |       |       |       |       |       |       |       |       |       |       | 1.123 | 0.856 | 0.930 |       |       |       |
| DCBLD2      |       |       |       |       |       |       |       |       |       | 1.173 | 1.387 | 1.158 |       |       |       |       |       |
| CUL5        |       |       |       |       |       |       |       |       |       | 0.930 | 1.496 |       |       |       | 1.098 | 0.844 |       |
| ABI2        | 1.090 | 0.740 | 1.048 | 1.457 |       |       |       |       |       |       |       |       |       |       | 1.111 | 1.749 |       |
| PPM1E       |       |       | 0.638 |       |       |       |       |       |       |       |       |       |       |       | 0.620 | 0.916 |       |
| HMG3        |       |       |       |       |       |       | 1.485 |       | 1.196 |       |       |       |       |       | 1.256 | 1.491 |       |
| PHF17       |       |       |       |       |       |       |       |       |       | 1.096 |       |       |       |       |       |       |       |
| LN2         | 0.668 |       | 0.608 |       |       |       |       |       |       |       |       |       |       |       | 0.459 |       |       |
| OCRL        |       |       | 1.435 | 2.087 |       |       |       |       |       |       |       |       |       |       | 1.143 | 2.038 |       |
| TMEM97      |       |       |       |       | 1.102 | 1.193 |       |       | 0.660 |       |       |       |       |       | 0.757 |       |       |
| SEN7        |       |       |       | 1.214 |       |       |       |       |       |       |       |       |       |       | 0.775 |       |       |
| ESCO2       | 0.584 | 0.652 |       |       |       |       |       | 1.059 |       | 0.804 |       |       |       |       |       |       |       |
| CBX1        |       | 0.619 |       |       |       |       | 1.071 |       | 1.038 |       |       |       |       |       | 0.826 | 1.560 |       |
| ARID1A      |       |       |       |       |       |       |       |       |       |       |       |       | 0.851 | 0.813 |       |       |       |
| CDR2        |       |       |       |       |       | 1.365 |       |       |       |       |       |       |       | 1.148 |       |       |       |
| UPF3B       |       |       |       | 0.715 |       |       |       |       | 0.898 |       |       |       |       | 0.778 |       |       |       |
| CENPA       |       |       |       | 0.798 |       |       |       | 0.943 |       |       |       | 1.044 |       |       | 0.758 |       |       |
| CENPM       | 1.170 |       |       |       |       |       |       | 0.996 |       | 0.876 | 1.131 |       |       | 0.991 |       |       |       |
| GADD45B     |       |       |       |       |       |       |       | 1.204 | 1.031 |       |       | 0.785 | 1.001 |       | 1.351 |       | 0.755 |
| TPM1 Ex13   |       | 1.254 |       | 1.169 |       | 1.141 | 0.664 | 1.099 | 0.998 |       |       |       | 0.848 | 0.886 | 0.820 |       |       |
| TPM1 Ex14   |       | 1.730 |       | 1.041 |       | 1.379 | 1.058 | 1.023 | 1.091 |       |       |       | 0.999 | 0.859 | 0.877 |       |       |
| TPM1 Ex15   |       | 0.866 |       | 0.877 |       | 1.279 | 1.016 | 0.533 | 0.854 |       |       |       | 0.783 | 0.587 | 0.484 |       |       |
| NISCH       | 1.086 | 0.835 | 0.395 | 0.882 | 0.443 | 1.161 |       |       | 0.425 |       |       |       |       |       | 1.315 |       |       |
| IL10RB      |       |       |       |       |       |       |       |       |       | 0.691 |       | 0.899 | 0.615 |       |       |       |       |
| PARP12      |       | 1.692 |       |       |       |       |       |       |       |       |       | 2.117 | 2.089 | 1.884 | 2.146 |       |       |
| DVL2        |       |       | 0.757 | 0.839 | 0.968 | 0.870 | 0.496 |       |       |       | 1.346 |       | 1.113 | 0.998 | 0.612 |       |       |
| COQ3        |       |       |       |       |       |       |       | 0.705 |       | 1.238 |       | 2.166 |       | 1.337 | 1.675 |       |       |
| INTS3       |       |       |       |       | 1.445 |       |       |       |       | 1.237 |       |       |       |       |       |       | 1.062 |
| PRKCD       |       |       |       | 1.341 | 1.427 |       |       |       | 0.646 |       |       |       |       |       |       |       |       |
| PDAP1       |       |       |       |       |       |       |       | 1.159 | 1.618 |       | 1.349 |       |       |       | 1.178 |       |       |
| UBA3        |       |       |       |       |       |       |       |       | 1.829 |       |       |       |       | 1.702 | 0.917 | 0.722 |       |
| VBP1        |       |       |       |       | 2.220 |       |       |       |       |       |       |       |       | 2.215 | 0.919 |       |       |
| N4BP2       | 0.760 |       |       |       |       | 1.177 |       |       |       | 0.642 | 0.732 |       |       |       |       |       |       |
| FANCC       |       |       |       |       |       |       |       | 1.021 |       | 0.823 |       | 0.869 |       |       |       |       |       |
| E2F2        |       |       |       |       |       |       |       | 0.817 | 1.079 | 1.329 |       |       |       |       |       |       | 0.445 |
| TNPO3       |       | 1.670 |       |       | 1.522 | 1.778 |       | 1.381 |       |       |       |       |       |       |       | 1.895 |       |
| UPF3B       |       |       |       | 0.885 |       |       |       | 0.654 | 0.905 |       | 0.975 |       |       |       | 1.359 |       |       |
| S100PBP     |       |       | 0.880 |       |       | 1.531 |       |       |       |       |       |       |       | 1.187 | 1.582 |       |       |
| NUP188      |       |       |       |       |       |       |       |       |       |       | 1.435 | 1.396 | 0.957 |       |       |       |       |
| SLC7A5      | 0.802 |       |       |       |       |       |       |       |       |       | 1.240 | 0.873 |       |       |       |       |       |
| NUSAP1      |       |       |       |       |       |       |       |       |       | 1.055 |       |       |       | 1.065 | 1.624 |       |       |
| RNF115      |       |       |       |       | 1.116 |       | 1.129 |       |       | 1.512 |       |       |       |       | 1.065 |       |       |
| BIRC5       | 0.792 | 1.323 | 0.917 | 1.400 | 1.344 | 1.116 | 0.998 |       |       | 0.907 | 0.907 | 0.789 | 0.793 |       |       | 0.995 | 0.697 |

| 3'UTR/miRNA | 1     | 2     | 3     | 3star | 4_3   | 4_5   | 5     | 6_3   | 6_5   | 7     | 8     | 9     | 9star | 10a   | 10b   | 11    | 12-5  |
|-------------|-------|-------|-------|-------|-------|-------|-------|-------|-------|-------|-------|-------|-------|-------|-------|-------|-------|
| CTSZ        |       |       |       | 0.224 |       |       |       |       |       |       |       |       |       | 0.117 |       |       |       |
| IRAK1       | 0.053 | 0.060 | 0.035 | 0.075 | 0.088 | 0.051 | 0.016 | 0.099 | 0.091 | 0.126 | 0.152 | 0.082 | 0.110 | 0.194 | 0.167 | 0.187 |       |
| TNFRSF12A   | 0.062 | 0.043 | 0.080 | 0.277 | 0.046 | 0.195 | 0.225 | 0.192 | 0.118 | 0.032 | 0.131 | 0.200 | 0.112 | 0.030 | 0.065 | 0.146 |       |
| VCL         |       | 0.033 | 0.021 |       |       |       |       | 0.047 | 0.007 |       | 0.189 |       |       |       |       |       |       |
| EPOR        |       |       |       |       |       |       |       |       |       |       |       | 0.111 | 0.096 |       | 0.069 |       |       |
| TAGLN       |       | 0.237 |       | 0.205 |       |       |       |       |       |       | 0.379 |       |       |       |       |       |       |
| FOXK2       |       |       |       |       | 0.302 |       |       |       |       |       | 0.309 |       |       |       |       |       |       |
| JARID1B     |       |       |       |       |       |       |       |       |       |       |       |       |       |       |       |       |       |
| MET         | 0.148 |       |       |       |       | 0.389 | 0.505 |       |       |       |       |       |       |       | 0.332 | 0.571 | 0.113 |
| CORT        |       |       |       |       |       |       |       |       |       |       |       | 0.316 | 0.095 | 0.137 |       |       |       |
| DCBLD2      |       |       |       |       |       |       |       |       |       | 0.528 | 0.543 |       |       | 0.414 |       |       |       |
| CUL5        |       |       |       |       |       |       |       |       |       | 0.082 | 0.637 |       |       | 0.116 | 0.172 |       |       |
| ABI2        | 0.238 | 0.167 | 0.170 | 0.397 |       |       |       |       |       |       |       |       |       | 0.286 | 0.425 |       |       |
| PPM1E       |       |       | 0.086 |       |       |       |       |       |       |       |       |       |       | 0.077 | 0.577 |       |       |
| HMG3        |       |       |       |       |       |       | 0.134 |       | 0.330 |       |       |       |       | 0.241 | 0.046 |       |       |
| PHF17       |       |       |       |       |       |       |       |       |       | 0.167 |       |       |       | 0.018 |       |       |       |
| LN2         | 0.067 |       | 0.036 |       |       |       |       |       |       |       |       |       |       | 0.133 |       |       |       |
| OCRL        |       |       | 0.059 | 0.412 |       |       |       |       |       |       |       |       |       | 0.219 | 0.516 |       |       |
| TMEM97      |       |       |       |       | 0.203 | 0.216 |       |       | 0.088 |       |       |       |       | 0.112 |       |       |       |
| SEN7        |       |       |       | 0.464 |       |       |       |       |       |       |       |       |       | 0.044 |       |       |       |
| ESCO2       | 0.068 | 0.057 |       |       |       |       |       | 0.253 |       | 0.133 |       |       |       |       |       |       |       |
| CBX1        |       | 0.118 |       |       |       |       | 0.383 |       | 0.338 |       |       |       |       | 0.258 | 1.068 |       |       |
| ARID1A      |       |       |       |       |       |       |       |       |       |       |       |       | 0.215 | 0.169 |       |       |       |
| CDR2        |       |       |       |       |       | 0.238 |       |       |       |       |       |       |       | 0.212 |       |       |       |
| UPF3B       |       |       |       | 0.247 |       |       |       |       | 0.200 |       |       |       |       | 0.134 |       |       |       |
| CENPA       |       |       |       | 0.060 |       |       |       | 0.204 |       |       |       | 0.377 |       |       | 0.210 |       |       |
| CENPM       | 0.288 |       |       |       |       |       |       | 0.621 |       | 0.146 | 0.092 |       |       | 0.228 |       |       |       |
| GADD45B     |       |       |       |       |       |       |       | 0.151 | 0.119 |       |       | 0.047 | 0.189 |       | 0.283 |       | 0.063 |
| TPM1 Ex13   |       | 0.180 |       | 0.062 |       | 0.212 | 0.048 | 0.069 | 0.165 |       |       |       | 0.166 | 0.093 | 0.140 |       |       |
| TPM1 Ex14   |       | 0.319 |       | 0.161 |       | 0.147 | 0.123 | 0.068 | 0.273 |       |       |       | 0.061 | 0.143 | 0.239 |       |       |
| TPM1 Ex15   |       | 0.172 |       | 0.155 |       | 0.227 | 0.178 | 0.032 | 0.155 |       |       |       | 0.121 | 0.084 | 0.084 |       |       |
| NISCH       | 0.046 | 0.107 | 0.046 | 0.066 | 0.052 | 0.076 |       |       | 0.087 |       |       |       |       |       | 0.133 |       |       |
| IL10RB      |       |       |       |       |       |       |       |       |       | 0.054 |       | 0.387 | 0.145 |       |       |       |       |
| PARP12      |       | 0.331 |       |       |       |       |       |       |       |       |       | 0.646 | 0.231 | 0.743 | 0.852 |       |       |
| DVL2        |       |       | 0.166 | 0.166 | 0.033 | 0.227 | 0.111 |       |       |       | 0.299 |       | 0.132 | 0.306 | 0.214 |       |       |
| COQ3        |       |       |       |       |       |       |       | 0.383 |       | 0.258 |       | 0.986 |       | 0.199 | 0.247 |       |       |
| INTS3       |       |       |       |       | 0.195 |       |       |       | 0.090 |       | 0.188 |       |       |       | 0.088 |       |       |
| PRKCD       |       |       |       | 0.330 | 0.122 |       |       |       |       |       |       |       |       |       |       |       |       |
| PDAP1       |       |       |       |       |       |       |       | 0.491 | 0.019 |       | 0.449 |       |       |       |       | 0.417 |       |
| UBA3        |       |       |       |       |       |       |       |       | 0.623 |       |       |       |       | 0.051 | 0.205 | 0.119 |       |
| VBP1        |       |       |       |       | 0.356 |       |       |       |       |       |       |       |       | 0.378 | 0.165 |       |       |
| N4BP2       | 0.115 |       |       |       |       | 0.107 |       |       |       | 0.119 | 0.070 |       |       |       |       |       |       |
| FANCC       |       |       |       |       |       |       |       | 0.150 |       | 0.182 |       | 0.123 |       |       |       |       |       |
| E2F2        |       |       |       |       |       |       |       | 0.130 | 0.126 | 0.048 |       |       |       |       |       |       | 0.082 |
| TNPO3       |       | 0.116 |       |       | 0.023 | 0.303 |       | 0.311 |       |       |       |       |       |       |       | 0.113 |       |
| UPF3B       |       |       |       | 0.270 |       |       |       | 0.065 | 0.155 |       | 0.305 |       |       |       | 0.284 |       |       |
| S100PBP     |       |       | 0.090 |       |       | 0.582 |       |       |       |       |       |       |       | 0.142 | 0.366 |       |       |
| NUP188      |       |       |       |       |       |       |       |       |       |       | 0.388 | 0.116 | 0.012 |       |       |       |       |
| SLC7A5      | 0.069 |       |       |       |       |       |       |       |       |       | 0.449 | 0.109 |       |       |       |       |       |
| NUSAP1      |       |       |       |       |       |       |       |       |       | 0.110 |       |       |       | 0.213 | 0.278 |       |       |
| RNF115      |       |       |       |       | 0.195 |       | 0.265 |       |       |       | 1.045 |       |       |       | 0.207 |       |       |
| BIRC5       | 0.030 | 0.067 | 0.092 | 0.394 | 0.051 | 0.062 | 0.196 |       |       | 0.372 | 0.074 | 0.066 | 0.070 |       |       | 0.135 | 0.098 |

**Oligo name    Oligo sequence (5' to 3')**

LNX2-a-f    AACTGATTTTCTGGTTTATTTCTACTGTAATCTCTCAATAA  
LNX2-a-r    TATTGAGAGATTACAGTAGAAATAAACCAGAAAATCAGTTA  
LNX2-b-f    AGATAAAACCATATTATTAAATACCTATATATCACAGCTAA  
LNX2-b-r    TAGCTGTGATATATAGGTATTTAATAATATGGTTTTATCTA  
LNX2-c-f    TGTCAGCAAAGCCAGTAACAACAGCGTGTACTGCCACTGTA  
LNX2-c-r    ACAGTGGCAGTACACGCTGTTGTTACTGGCTTTGCTGACAA  
UPF3B-b-f    GAATTTGGGTGGAGCAGAGTCGCTTTGAAGCCTTGTTCCG  
UPF3B-b-r    CGGAACAAGGCTTCAAAGCGACTCTGCTCCACCCAAATTC  
UBA3-a-f    AGTGCCATAGAGGCCAATATGCACAATATTAATAATGCCA  
UBA3-a-r    GGCATTAGTTAATATTGTGCATATTGGCCTCTATGGCACTA  
NISCH-a-f    TTGCTGTTGCTGTTGGCATCTTGCTGCTAATCCTGAGGCTA  
NISCH-a-r    AGCCTCAGGATTAGCAGCAAGATGCCAACAGCAACAGCAAA  
SLC7A5-a-f    GTGTGGCTGGGACCTTCTTTATTCTGTGTTAATGGCTAACA  
SLC7A5-a-r    GTTAGCCATTAACACAGAATAAAGAAGGTCCCAGCCACACA

LNX2-a-m1f    AACTGATTTTCTGGTTTATTTCTAGGCTAATCTCTCAATA  
LNX2-a-m1r    TATTGAGAGATTAGCCTAGAAATAAACCAGAAAATCAGTT  
LNX2-b-m1f    AGATAAAACCATATTATTAAATATAACATATATCACAGCTA  
LNX2-b-m1r    TAGCTGTGATATATGTATATTTAATAATATGGTTTTATCT  
LNX2-c-m1f    TGTCAGCAAAGCCAGTAACAACAGCGTAGCCTGCCACTGT  
LNX2-c-m1f    ACAGTGGCAGGCTACGCTGTTGTTACTGGCTTTGCTGACA  
NISCH-a-m1f    TTGCTGTTGCTGTTGGCATCTTGATGTAATCCTGAGGCT  
NISCH-a-m1r    AGCCTCAGGATTACATGCAAGATGCCAACAGCAACAGCAA

# Supplementary Table 5

## Interactions Report

| #  | From<br>Network Object<br>"FROM" | Object Type                   | To<br>Network Object<br>"TO" | Object Type                   | Effect      | Mechanism                | Homo sapiens | Link Info                                                                                                                                                                                                                                                                                                                                                               | References                                                                                                                         |
|----|----------------------------------|-------------------------------|------------------------------|-------------------------------|-------------|--------------------------|--------------|-------------------------------------------------------------------------------------------------------------------------------------------------------------------------------------------------------------------------------------------------------------------------------------------------------------------------------------------------------------------------|------------------------------------------------------------------------------------------------------------------------------------|
| 1  | STAT3                            | Transcription factor          | GADD45 beta                  | Generic binding protein       | Activation  | Transcription regulation | x            | putative Stat3 binding site on GADD45 beta was validated by measuring in vitro binding and in vivo occupancy.                                                                                                                                                                                                                                                           | 19282476;2046778                                                                                                                   |
| 2  | BIRC5                            | Generic binding protein       | STAT3                        | Transcription factor          | Inhibition  | Binding                  | x            | Acetylated BIRC5 binds to the N-terminal transcriptional activation domain of the STAT3 dimer and represses STAT3 transactivation of target gene promoters.                                                                                                                                                                                                             | 20928784                                                                                                                           |
| 3  | STAT3                            | Transcription factor          | NABP2                        | Generic kinase                | Unspecified | Transcription regulation | x            | Stat3 binds to gene NABP2 promoter.                                                                                                                                                                                                                                                                                                                                     | 18005416                                                                                                                           |
| 4  | PKC-delta                        | Protein kinase                | HGF receptor (Met)           | Receptor with enzyme activity | Inhibition  | Phosphorylation          | x            | PKC-delta phosphorylates HGF receptor (Met) and decreases its activity.                                                                                                                                                                                                                                                                                                 | 15075332                                                                                                                           |
| 5  | RAK1                             | Protein kinase                | STAT3                        | Transcription factor          | Activation  | Phosphorylation          | x            | RAK1 phosphorylates STAT3 and increases its activity.                                                                                                                                                                                                                                                                                                                   | 15465816                                                                                                                           |
| 6  | STAT3                            | Transcription factor          | BIRC5                        | Generic binding protein       | Activation  | Transcription regulation | x            | Activated Stat3 signaling contributes to breast cancer progression and resistance to chemotherapy by, at least in part, inducing expression of the antiapoptotic protein, BIRC5.                                                                                                                                                                                        | 136778425;16397018;16529541;17533050;17934481;18075512;18242580;18744341;19880237;19937972;21521803                                |
| 7  | STAT3                            | Transcription factor          | STAT3                        | Transcription factor          | Activation  | Binding                  | x            | Dimeric and tetrameric STAT3 complexes formation is required for transcriptional activity of STAT3.                                                                                                                                                                                                                                                                     | 7701321;8609222;8762827;10458605;11438543;18849387;19053881                                                                        |
| 8  | HGF receptor (Met)               | Receptor with enzyme activity | GRB2                         | Generic binding protein       | Activation  | Binding                  | x            | HGF receptor (Met) directly binds to GRB2 and triggers RAS pathway.                                                                                                                                                                                                                                                                                                     | 1571210;8628899;91828210;9550480;100599803;11430831;11439336;11900489;12766170;15546961;16724056;17065554;17440121;8900286;9224282 |
| 9  | Epo receptor                     | Generic receptor              | Epo receptor                 | Generic receptor              | Activation  | Binding                  | x            | Our results indicate that Epo exerts its antiapoptotic effects on differentiated SH-SY5Y and PC-12 cells through the standard stoichiometry of one molecule of Epo binding to two Epok subunits, comprising the HGF stimulates recruitment of Stat-3 to the receptor, tyrosine phosphorylation, nuclear translocation and binding to the specific promoter element SIE. | 9793257;10912517;1287756;17045762                                                                                                  |
| 10 | HGF receptor (Met)               | Receptor with enzyme activity | STAT3                        | Transcription factor          | Activation  | Binding                  | x            | Stat3 tyrosine phosphorylation is required for Stat3 association with PKC-delta.                                                                                                                                                                                                                                                                                        | 9440892;10068003;15254691;15468908;16724056                                                                                        |
| 11 | PKC-delta                        | Protein kinase                | STAT3                        | Transcription factor          | Activation  | Phosphorylation          | x            | Stat3 tyrosine phosphorylation is required for Stat3 association with PKC-delta.                                                                                                                                                                                                                                                                                        | 934341;13872331;10448219;10521505;16770494;1133571142;361954;12576423;12763138;1451213;15380937;16418226;16064308;17065554         |
| 12 | EPF2                             | Transcription factor          | BIRC5                        | Generic binding protein       | Unspecified | Transcription regulation | x            |                                                                                                                                                                                                                                                                                                                                                                         | 15271987;17916908                                                                                                                  |
| 13 | HGF receptor (Met)               | Receptor with enzyme activity | HGF receptor (Met)           | Receptor with enzyme activity | Activation  | Phosphorylation          | x            | HGF receptor (Met) phosphorylates HGF receptor (Met) and increases its activity.                                                                                                                                                                                                                                                                                        | 11779195                                                                                                                           |
| 14 | Epo receptor                     | Generic receptor              | STAT3                        | Transcription factor          | Activation  | Binding                  | x            | Epo receptor interacts with STAT3 and activates it.                                                                                                                                                                                                                                                                                                                     | 11756198;15752978                                                                                                                  |

Pubmed IDs

| <b>BIRC5 3'UTR data</b> | <b>24h</b> | <b>SD</b> | <b>N</b> | <b>48h</b> | <b>SD</b> | <b>N</b> |
|-------------------------|------------|-----------|----------|------------|-----------|----------|
| Neg1                    | 1.00       | 0.00      | 3        | 1.00       | 0.00      | 3        |
| miR-K1                  | 0.99       | 0.06      | 3        | 0.79       | 0.03      | 3        |
| miR-K2                  | 0.97       | 0.25      | 3        | 1.32       | 0.07      | 3        |
| miR-K3                  | 0.87       | 0.12      | 3        | 0.92       | 0.09      | 3        |
| miR-K3*                 | 1.13       | 0.35      | 3        | 1.40       | 0.39      | 3        |
| miR-K4-3                | 0.98       | 0.23      | 3        | 1.34       | 0.05      | 3        |
| miR-K8                  | 0.98       | 0.17      | 3        | 0.91       | 0.07      | 3        |
| mir-K9                  | 0.94       | 0.17      | 3        | 0.79       | 0.07      | 3        |
| miR-K11                 | 0.80       | 0.21      | 3        | 0.99       | 0.13      | 3        |
| miR-K12-5               | 0.63       | 0.16      | 3        | 0.70       | 0.10      | 3        |

**miRNAs that didn't show repression**

|          |      |      |   |      |      |   |
|----------|------|------|---|------|------|---|
| Neg1     | 1.00 | 0.00 | 3 | 1.00 | 0.00 | 3 |
| miR-K6-3 | 1.19 | 0.04 | 3 | 1.17 | 0.28 | 3 |
| miR-K6-5 | 1.69 | 0.13 | 3 | 2.54 | 1.07 | 3 |
| miR-K10b | 1.46 | 0.05 | 3 | 1.61 | 0.53 | 3 |
| miR-K12  | 1.44 | 0.11 | 3 | 1.90 | 0.67 | 3 |

Red if  $p < 0.05$
